# Supplementary material for: A complementary transposon tool kit for Drosophila melanogaster using P and piggyBac
Source: Springer Nature journal article supplement (doi:10.1038/ng1314), 2004-02-22
Supplement: ng1314-S2.pdf [file ng1314-S2.pdf]

**Supplementary Table 1. Hotspot Loci**

| <i>P</i> -element (XP) |                     |                                           |        |          |        | <i>piggyBac</i> (PB, RB, WH) |                   |                                           |        |          |        |
|------------------------|---------------------|-------------------------------------------|--------|----------|--------|------------------------------|-------------------|-------------------------------------------|--------|----------|--------|
| Chromosome             | Gene <sup>a</sup>   | Bin coordinates (start/stop) <sup>b</sup> |        |          |        | Chromosome                   | Gene <sup>a</sup> | Bin coordinates (start/stop) <sup>b</sup> |        |          |        |
| X                      | elav                | AE003417                                  | 243338 | AE003418 | 4373   | X                            | ade5              | AE003490                                  | 109518 | AE003490 | 159603 |
| X                      | NFAT                | AE003493                                  | 84454  | AE003493 | 134454 | X                            | CG15814           | AE003506                                  | 258852 | AE003507 | 6839   |
| X                      | CrebB-17A           | AE003508                                  | 210512 | AE003508 | 260359 | 2L                           | BcDNA:LD26519     | AE003590                                  | 55069  | AE003590 | 105068 |
| X                      | Wnt5                | AE003509                                  | 9706   | AE003509 | 59618  | 2L                           | CG3164            | AE003590                                  | 105069 | AE003590 | 155067 |
| X                      | Bx                  | AE003509                                  | 59618  | AE003509 | 109615 | 2L                           | stai              | AE003612                                  | 125541 | AE003612 | 175539 |
| X                      | Pvfl                | AE003510                                  | 54372  | AE003510 | 104180 | 2L                           | CG6785            | AE003634                                  | 178003 | AE003634 | 228002 |
| X                      | CG7502              | AE003511                                  | 57326  | AE003511 | 106572 | 2L                           | CG6448            | AE003782                                  | 262920 | AE003783 | 14863  |
| 2L                     | CG13791             | AE003617                                  | 256707 | AE003618 | 49450  | 2R                           | bin3              | AE003784                                  | 219284 | AE003784 | 269284 |
| 2L                     | IP3K1               | AE003626                                  | 32699  | AE003626 | 82699  | 2R                           | cn                | AE003840                                  | 246026 | AE003839 | 23911  |
| 2R                     | 1.28                | AE003784                                  | 269285 | AE003789 | 169758 | 2R                           | CG9003            | AE003825                                  | 133706 | AE003825 | 183705 |
| 2R                     | CG30465             | AE003810                                  | 174782 | AE003810 | 224781 | 2R                           | CG10082           | AE003454                                  | 233171 | AE003454 | 283170 |
| 2R                     | GstS1               | AE003804                                  | 82225  | AE003804 | 132224 | 2R                           | HmgD              | AE003454                                  | 283171 | AE003455 | 19595  |
| 2R                     | Or59a               | AE003460                                  | 245862 | AE003460 | 295861 | 3L                           | Pk61C             | AE003467                                  | 99966  | AE003467 | 149965 |
| 3L                     | emc                 | AE003469                                  | 91359  | AE003469 | 141358 | 3L                           | E(bx)             | AE003467                                  | 199966 | AE003467 | 249965 |
| 3L                     | CG14959             | AE003477                                  | 155635 | AE003477 | 205634 | 3L                           | ban               | AE003468                                  | 298957 | AE003469 | 41359  |
| 3L                     | CG15876             | AE003482                                  | 50579  | AE003482 | 100577 | 3L                           | CG32076           | AE003547                                  | 24731  | AE003547 | 74669  |
| 3L                     | LanA                | AE003563                                  | 78562  | AE003563 | 130316 | 3L                           | JIL-1             | AE003546                                  | 193343 | AE003546 | 243334 |
| 3L                     | bip1                | AE003557                                  | 264374 | AE003556 | 27244  | 3L                           | NUCB1             | AE003523                                  | 266247 | AE003522 | 25697  |
| 3L                     | Eip75B <sup>c</sup> | AE003522                                  | 188500 | AE003522 | 238499 | 3L                           | W                 | AE003521                                  | 84890  | AE003521 | 134890 |
| 3R                     | tensin              | AE003683                                  | 30095  | AE003683 | 80094  | 3L                           | CG6020            | AE003591                                  | 123643 | AE003591 | 174134 |
| 3R                     | CG14709             | AE003692                                  | 32891  | AE003692 | 82889  | 3R                           | CG8036            | AE003679                                  | 193050 | AE003680 | 26116  |
| 3R                     | CG13624             | AE003748                                  | 109661 | AE003748 | 159660 | 3R                           | CG33188           | AE003682                                  | 104657 | AE003682 | 154655 |
| 3R                     | ttk <sup>c</sup>    | AE003779                                  | 103241 | AE003779 | 153237 | 3R                           | Tk                | AE003693                                  | 205367 | AE003694 | 28659  |
|                        |                     |                                           |        |          |        | 3R                           | desat1            | AE003695                                  | 202642 | AE003696 | 27046  |
|                        |                     |                                           |        |          |        | 3R                           | CG3590            | AE003715                                  | 192049 | AE003716 | 13558  |
|                        |                     |                                           |        |          |        | 4                            | CG10204           | AE003844                                  | 233890 | AE003844 | 284037 |

<sup>a</sup>gene containing (or nearest to) the most insertions within the 50 kb bin<sup>b</sup>GenBank accession and base pair. 50 kb bins were originally generated using *Drosophila* genome assembly release 2; the accessions reflect the latest release 3.1<sup>c</sup>Genes identified as *P*-element hotspots from a recessive lethal collection<sup>2</sup>
