# Supplementary figures and images for: A complementary transposon tool kit for Drosophila melanogaster using P and piggyBac
Source: Springer Nature journal article supplement (doi:10.1038/ng1314), 2004-02-22

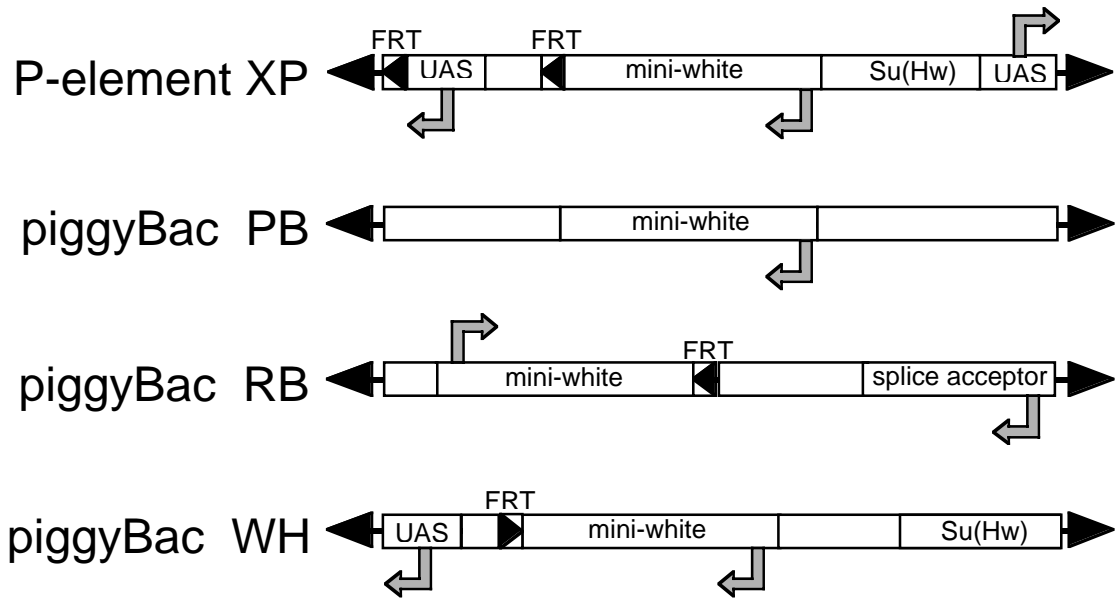

Supplement: ng1314-S1.pdf [file ng1314-S1.pdf]
